# Supplementary material for: Construction of Reference Chromosome-Scale Pseudomolecules for Potato: Integrating the Potato Genome with Genetic and Physical Maps
Source: PubMed Central journal article supplement (PMC3815063; doi:10.1534/g3.113.007153), 2013-11-01
Supplement: supp_g3.113.007153_007153SI.pdf [file supp_g3.113.007153_007153SI.pdf]

## Construction of reference chromosome-scale pseudomolecules for potato: Integrating the potato genome with genetic and physical maps

Sanjeev Kumar Sharma<sup>\*1</sup>, Daniel Bolser<sup>§1,2</sup>, Jan de Boer<sup>†</sup>, Mads Sønderkær<sup>‡</sup>, Walter Amoros<sup>\*\*</sup>, Martin Federico Carboni<sup>§§</sup>, Juan Martín D'Ambrosio<sup>§§</sup>, German de la Cruz<sup>††</sup>, Alex Di Genova<sup>‡‡</sup>, David S. Douches<sup>\*\*\*</sup>, Maria Eguiluz<sup>§§§</sup>, Xiao Guo<sup>†††</sup>, Frank Guzman<sup>§§§3</sup>, Christine A. Hackett<sup>‡‡‡</sup>, John P. Hamilton<sup>\*\*\*\*</sup>, Guangcun Li<sup>†††</sup>, Ying Li<sup>§§§§</sup>, Roberto Lozano<sup>§§§</sup>, Alejandro Maass<sup>‡‡</sup>, David Marshall<sup>††††</sup>, Diana Martinez<sup>§§§</sup>, Karen McLean<sup>\*</sup>, Nilo Mejía<sup>‡‡‡‡</sup>, Linda Milne<sup>††††</sup>, Susan Munive<sup>\*\*</sup>, Istvan Nagy<sup>\*\*\*\*4</sup>, Olga Ponce<sup>§§§</sup>, Manuel Ramirez<sup>§§§</sup>, Reinhard Simon<sup>\*\*</sup>, Susan J. Thomson<sup>§§§§</sup>, Yerisf Torres<sup>§§§</sup>, Robbie Waugh<sup>\*</sup>, Zhonghua Zhang<sup>§§§§</sup>, Sanwen Huang<sup>§§§§</sup>, Richard G. F. Visser<sup>†</sup>, Christian W. B. Bachem<sup>†</sup>, Boris Sagredo<sup>††††</sup>, Sergio E. Feingold<sup>§§</sup>, Gisella Orjeda<sup>§§§</sup>, Richard E. Veilleux<sup>‡‡‡‡</sup>, Merideth Bonierbale<sup>\*\*</sup>, Jeanne M. E. Jacobs<sup>§§§§</sup>, Dan Milbourne<sup>\*\*\*\*\*</sup>, David Michael Alan Martin<sup>§</sup>, Glenn J. Bryan<sup>\*5</sup>

<sup>\*</sup>Cell and Molecular Sciences, The James Hutton Institute, Dundee DD2 5DA, United Kingdom

<sup>§</sup>Division of Biological Chemistry and Drug Discovery, College of Life Sciences, University of Dundee, Dundee DD1 5EH, United Kingdom

<sup>†</sup>Laboratory of Plant Breeding, Department of Plant Sciences, Wageningen-UR, Wageningen, The Netherlands

<sup>‡</sup>Department of Biotechnology, Chemistry and Environmental Engineering, Aalborg University, Aalborg, Denmark

<sup>\*\*</sup>International Potato Center (CIP), Lima 12, Peru

<sup>§§</sup>Laboratorio de Agrobiotecnología, Instituto Nacional de Tecnología Agropecuaria (INTA) cc276 (7620) Balcarce, Argentina

<sup>††</sup>Laboratorio de Genética y Biotecnología Vegetal, Universidad Nacional San Cristobal de Huamanga, Ayacucho, Perú

<sup>‡‡</sup>Mathomics, Centro de Regulación Genómica & Centro de Modelamiento Matemático, Universidad de Chile, Santiago, Chile

<sup>\*\*\*</sup>Department of Crop and Soil Sciences, Michigan State University, Michigan, United States of America

<sup>§§§</sup>Genomics Research Unit, Facultad de Ciencias, Universidad Peruana Cayetano Heredia, Lima 31, Peru

<sup>†††</sup>Institute of Vegetables, Shandong Academy of Agricultural Sciences, Jinan 250100, China

<sup>‡‡‡</sup>Biomathematics and Statistics Scotland, Dundee DD2 5DA, United Kingdom

<sup>\*\*\*\*</sup>Department of Plant Biology, Michigan State University, Michigan, United States of America

<sup>§§§§</sup>Institute of Vegetables and Flowers, Chinese Academy of Agricultural Sciences, Beijing 100081, China

<sup>††††</sup>Information and Computational Sciences, The James Hutton Institute, Dundee DD2 5DA, United Kingdom

<sup>‡‡‡‡</sup>INIA-La Platina, Santiago, Chile

<sup>\*\*\*\*\*</sup>Crops Environment and Land Use Programme, Teagasc, Carlow, Ireland

<sup>§§§§§</sup>The New Zealand Institute for Plant & Food Research Ltd., Christchurch 8120, New Zealand

<sup>†††††</sup>INIA-Rayentué, Rengo, Chile

<sup>‡‡‡‡‡</sup>Department of Horticulture, Virginia Tech, Virginia, United States of America

### Footnotes:

<sup>1</sup>S. K. Sharma and D. Bolser contributed equally to this work

<sup>2</sup>Current Address: The EMBL-European Bioinformatics Institute, Wellcome Trust Genome Campus, Cambridge CB10 1SD, United Kingdom

<sup>3</sup>Current Address: Departamento de Genética, Universidade Federal do Rio Grande do Sul - UFRGS, Rio Grande do Sul, Brazil

<sup>4</sup>Current Address: Department of Molecular Biology and Genetics, Aarhus University, Slagelse DK-4200, Denmark

<sup>5</sup>Corresponding Author

DOI: 10.1534/g3.113.007153

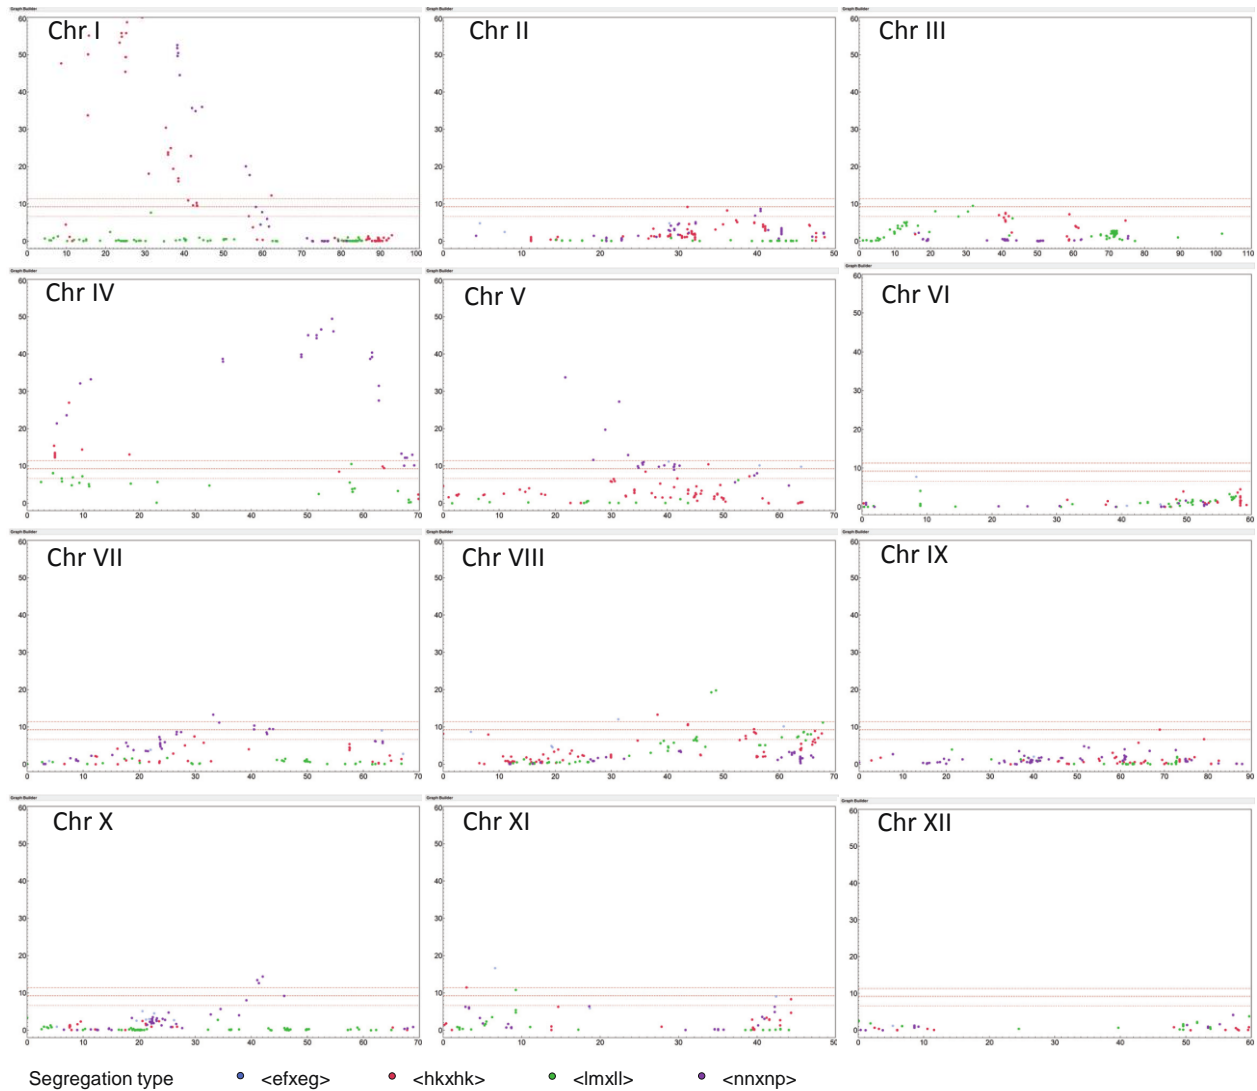

**Figure S1** Genome-wide patterns of marker segregation distortion in DMDD population for 1830 STS markers from different segregation categories plotted as a function of Chi-square value (y-axis) against marker physical position (x-axis) on each of the 12 potato chromosomes. Dotted, dashed and dotted-dashed lines represent Chi-square significance values at  $p = 0.01$  for marker segregation categories with two, three and four genotypic classes, respectively.

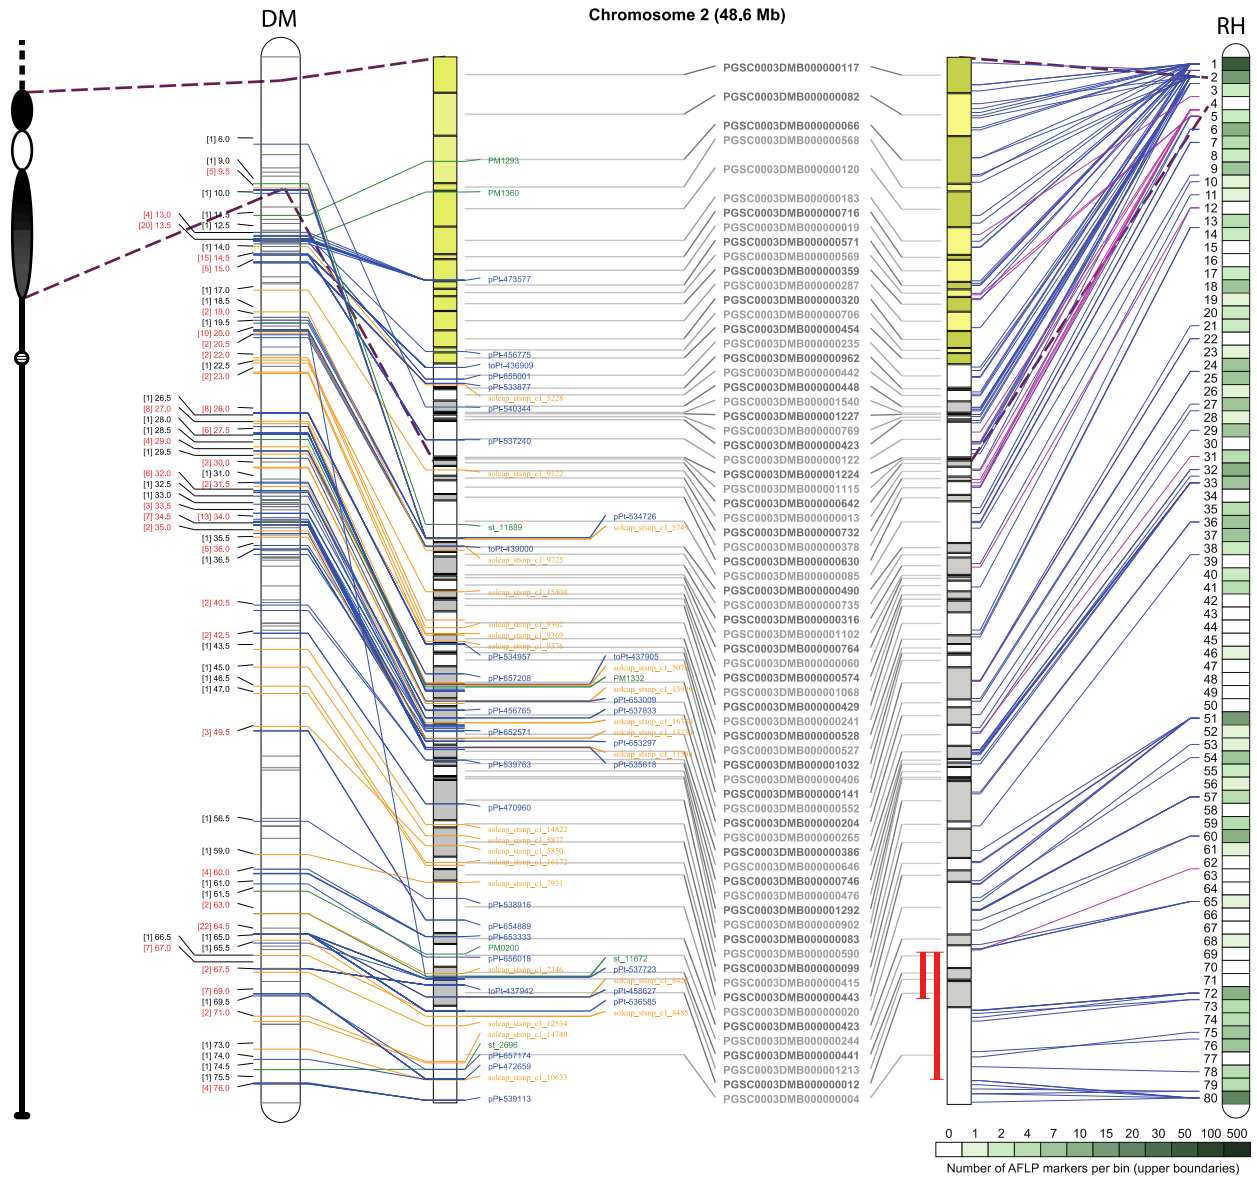

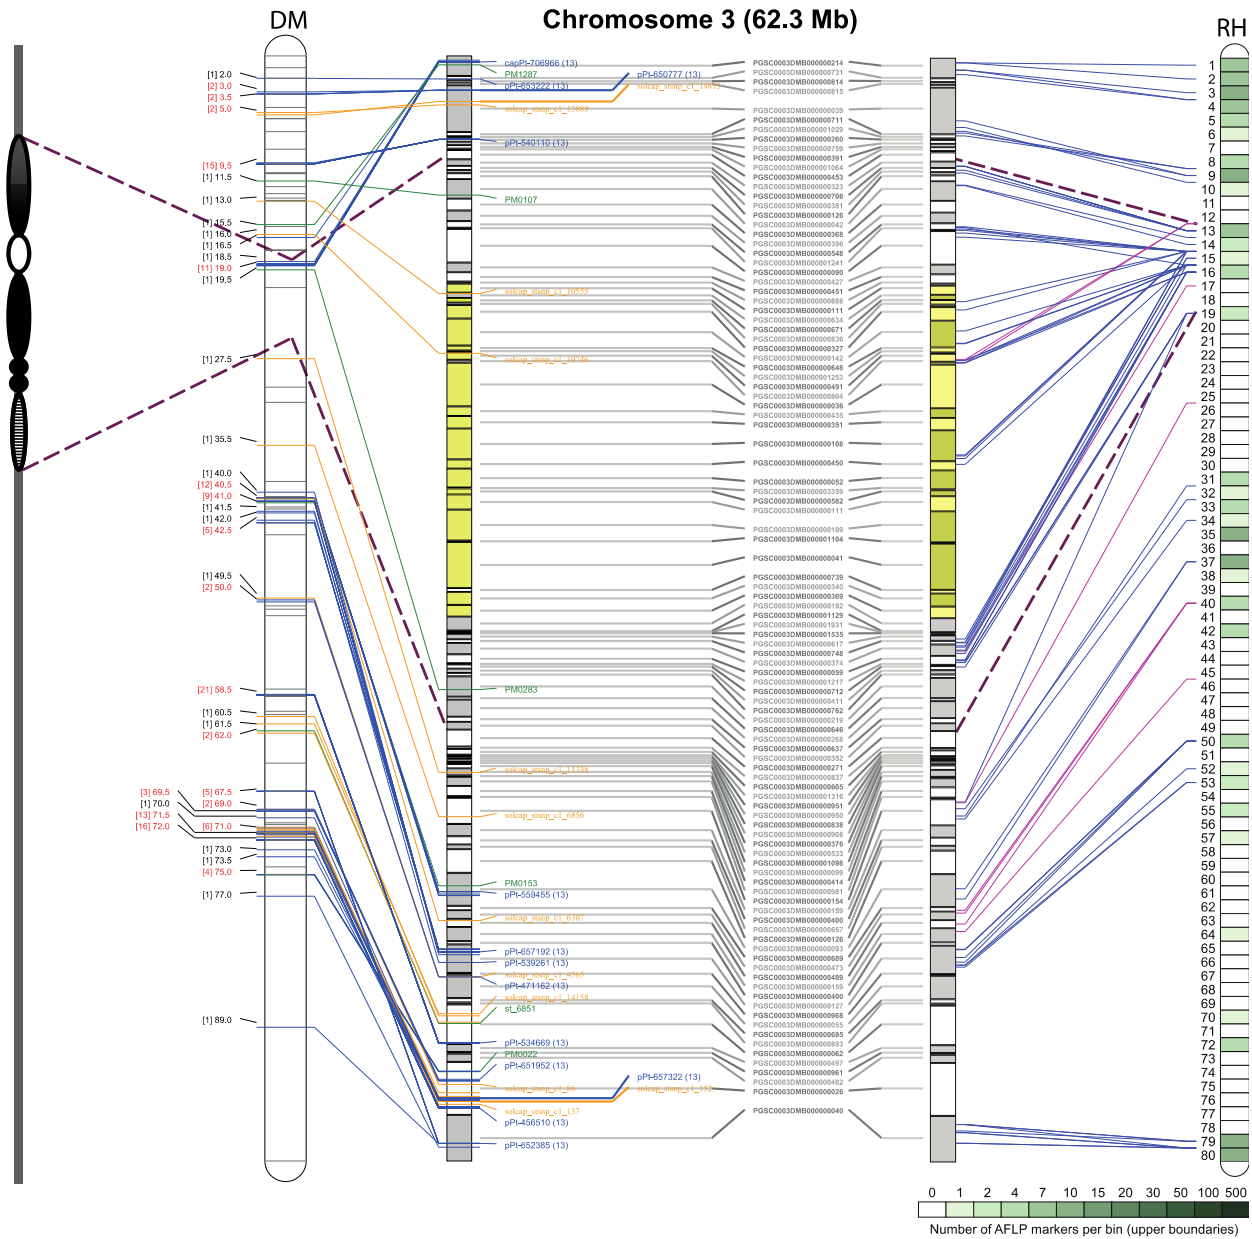

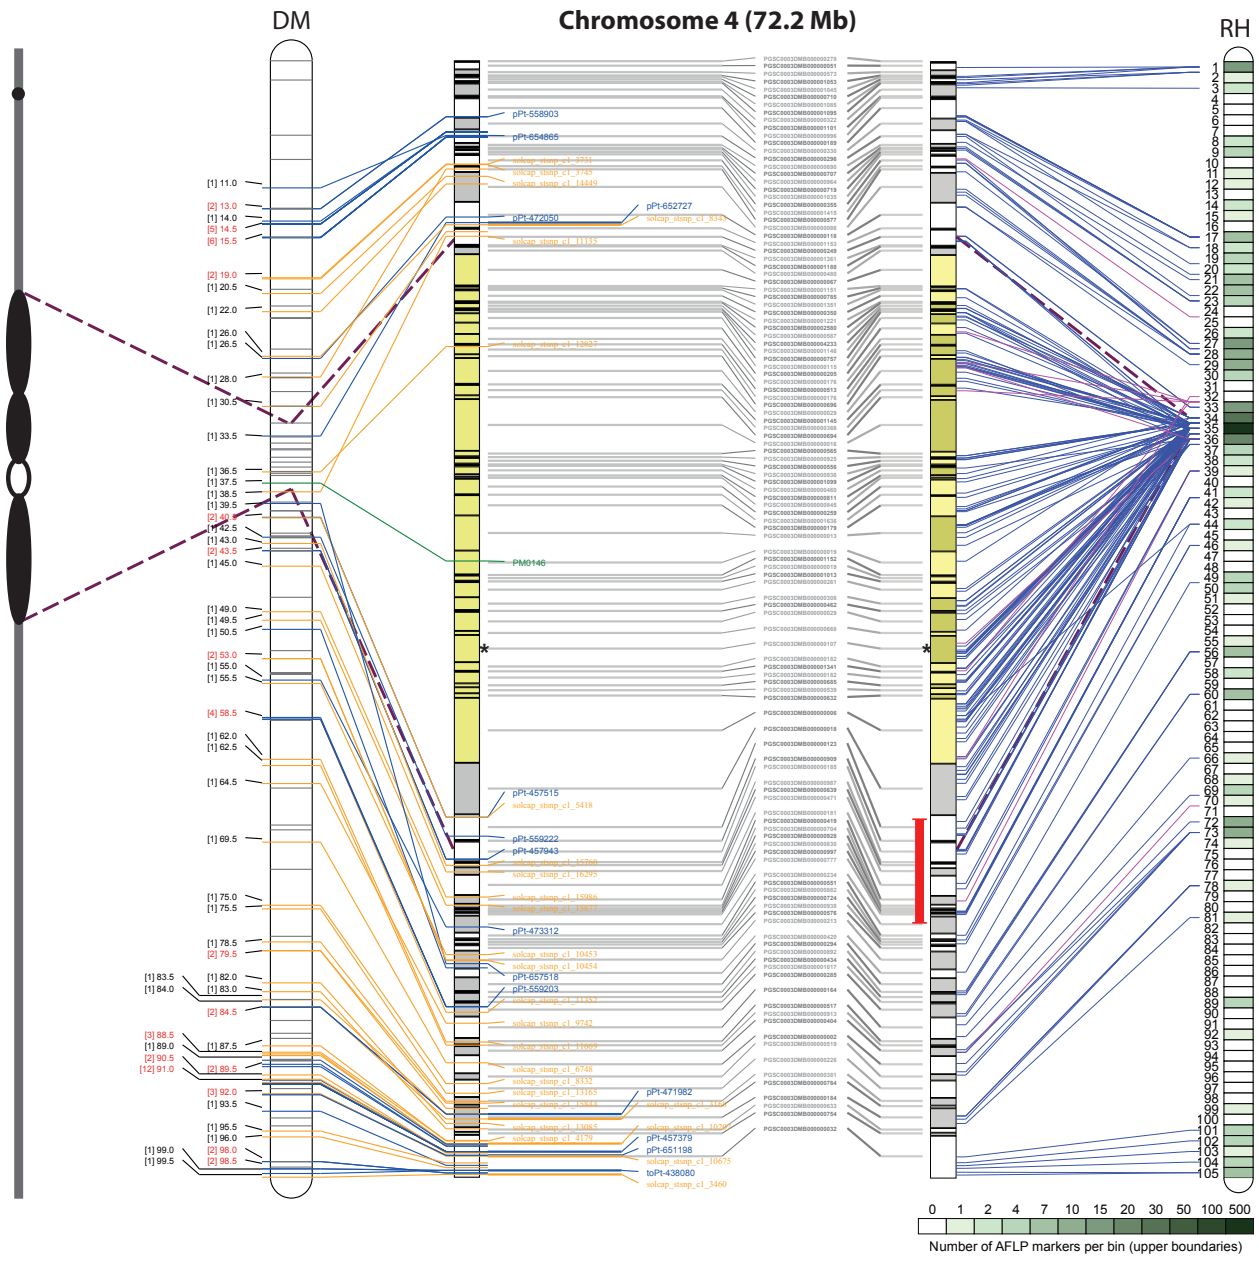

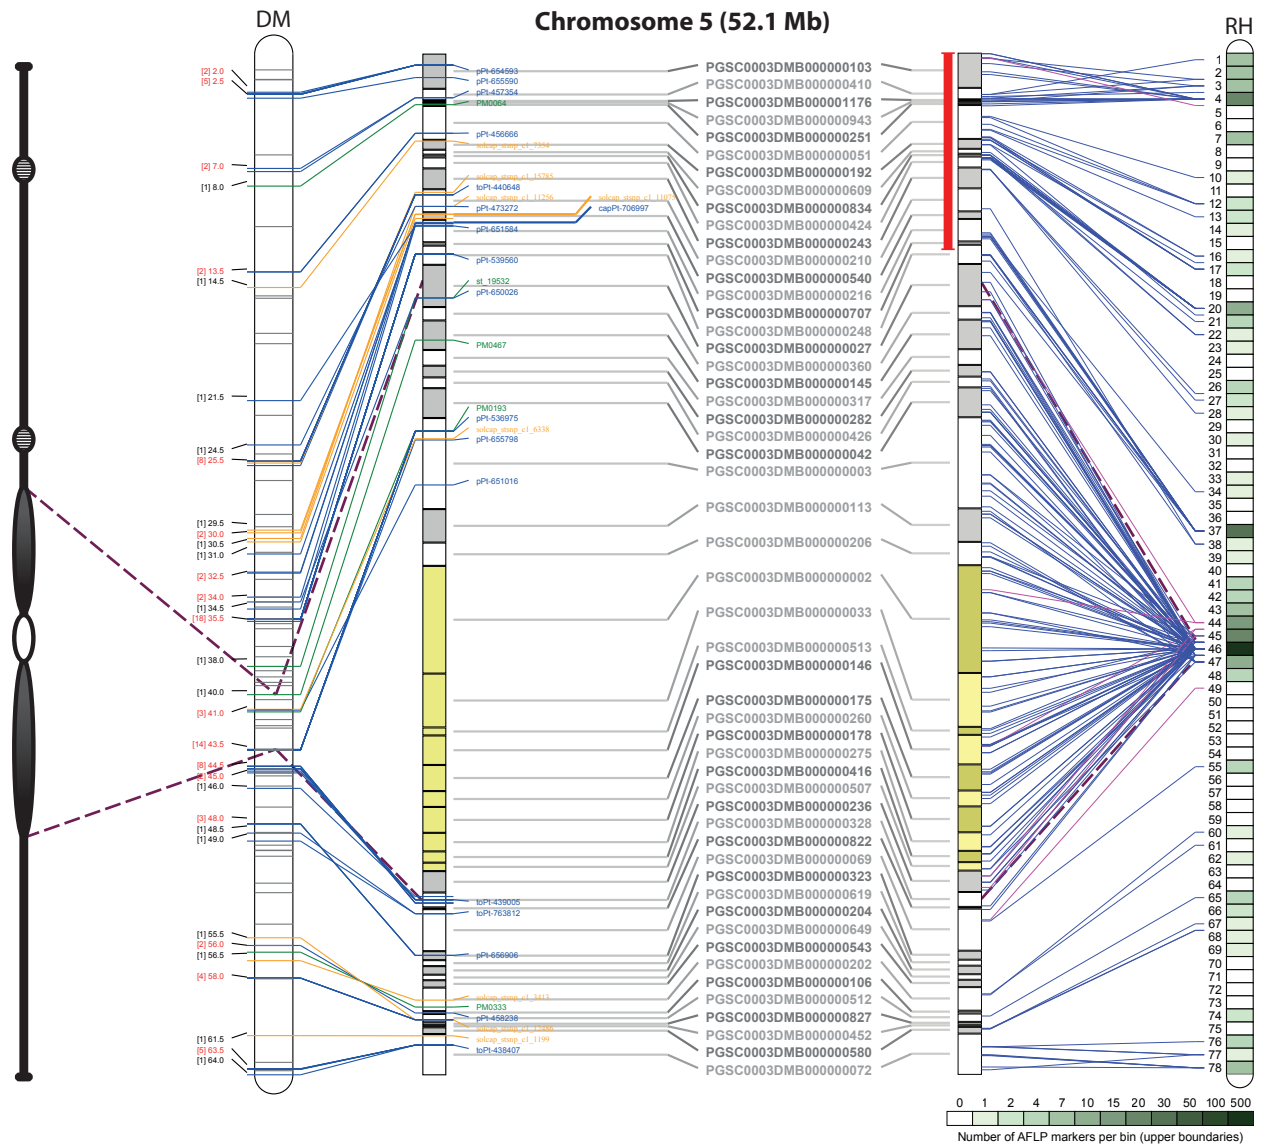

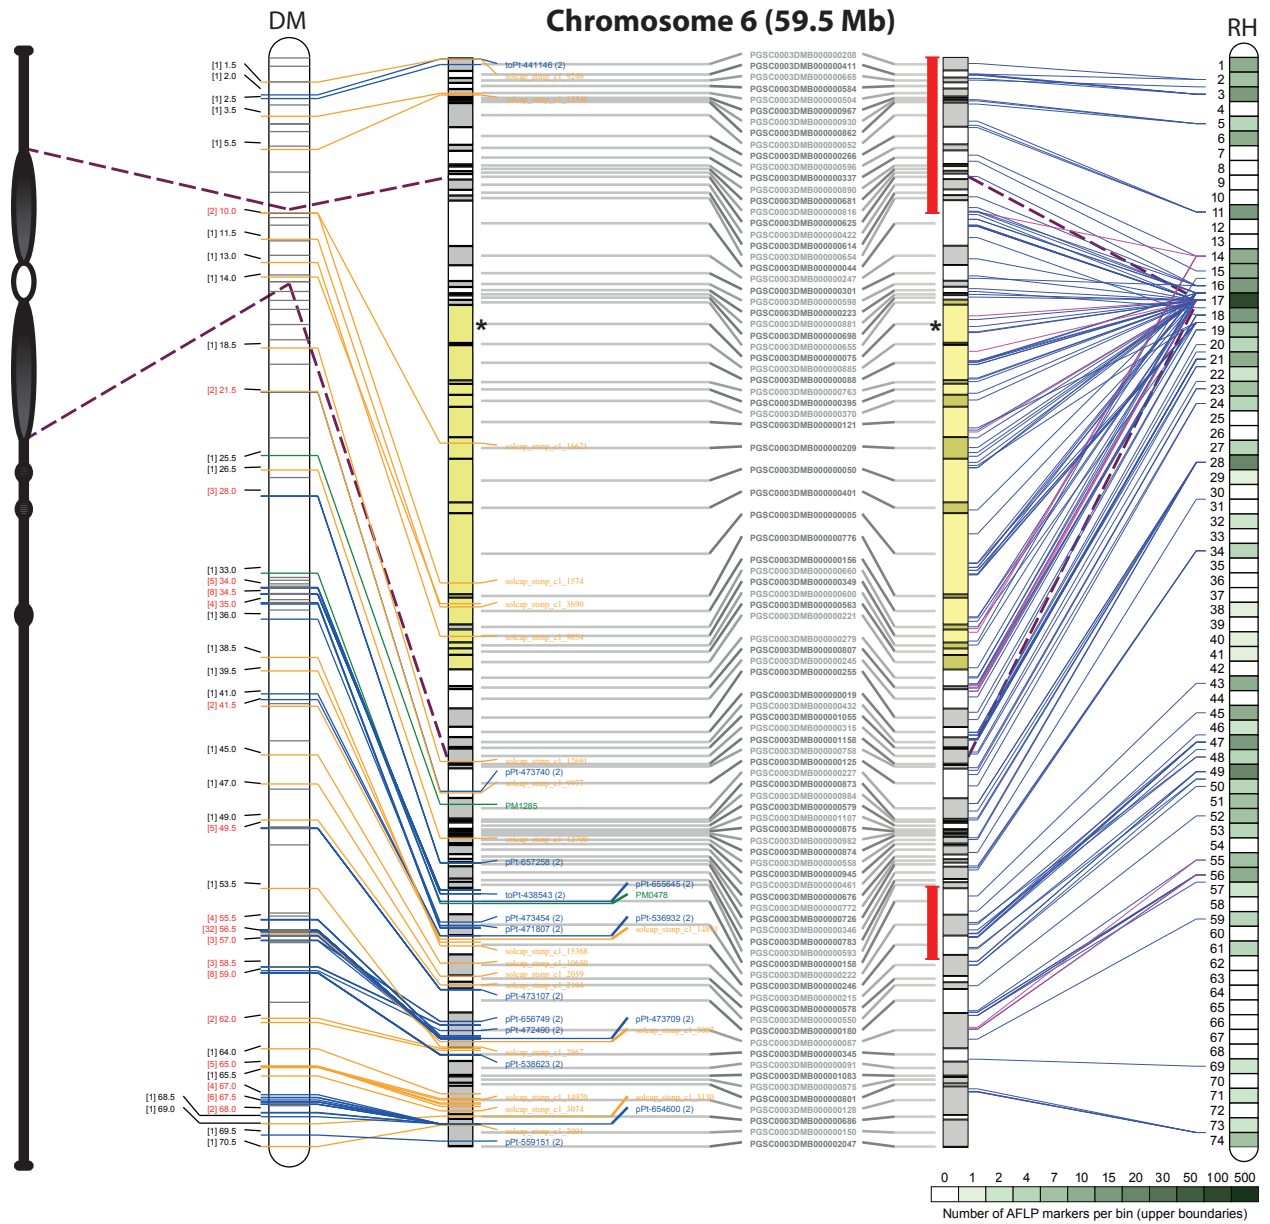

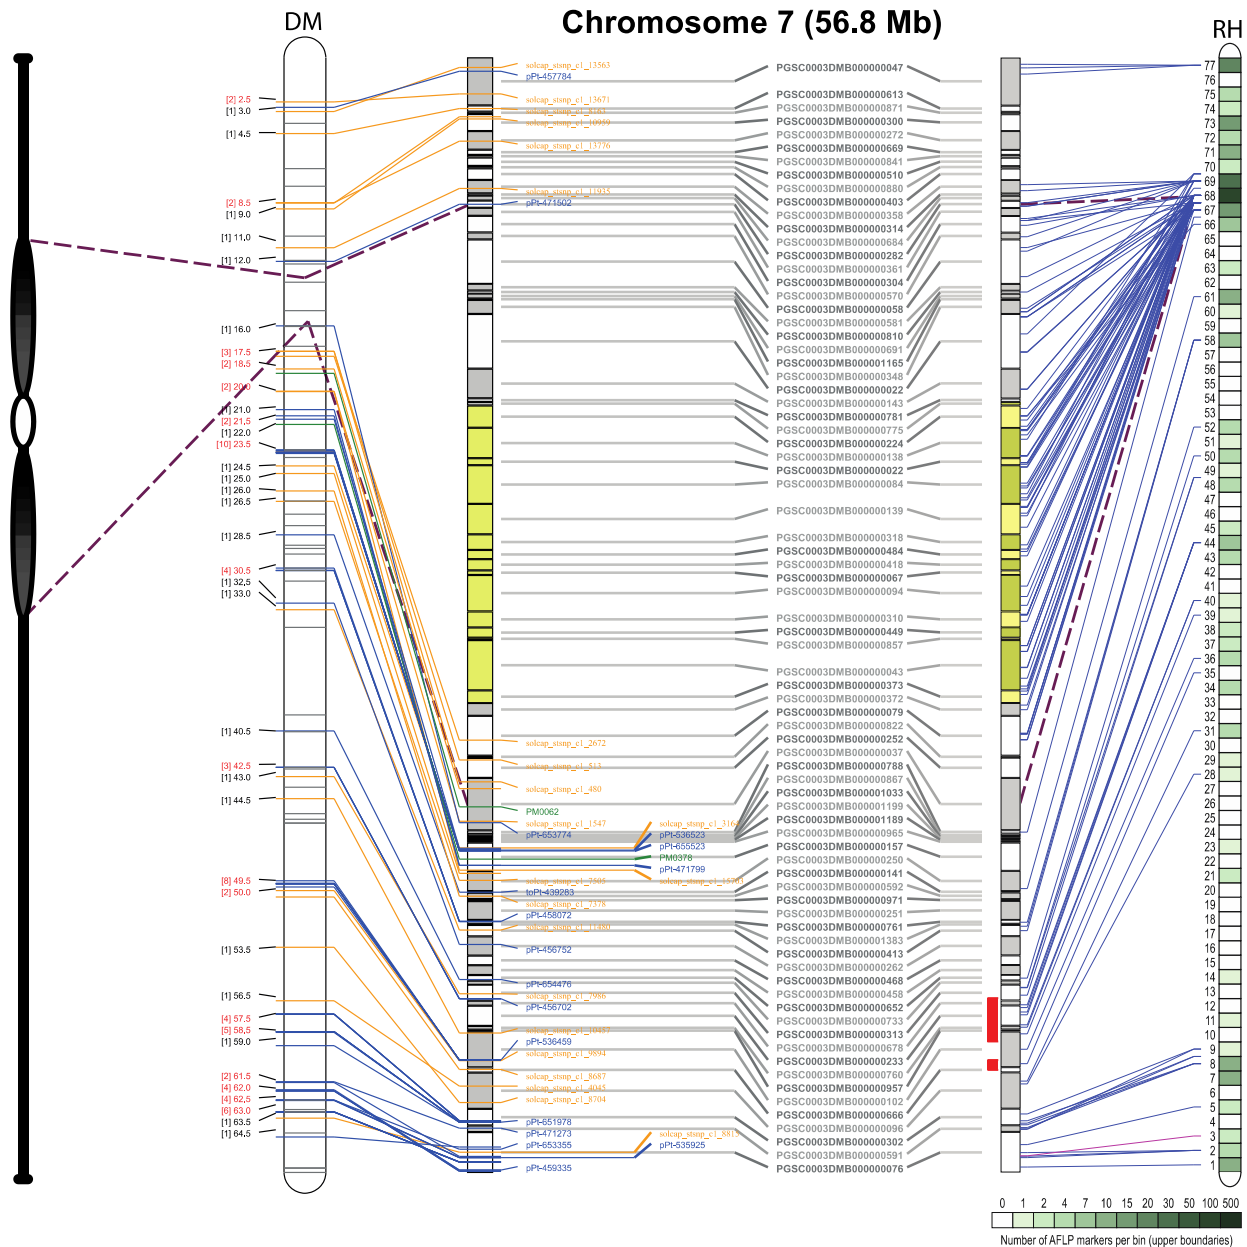



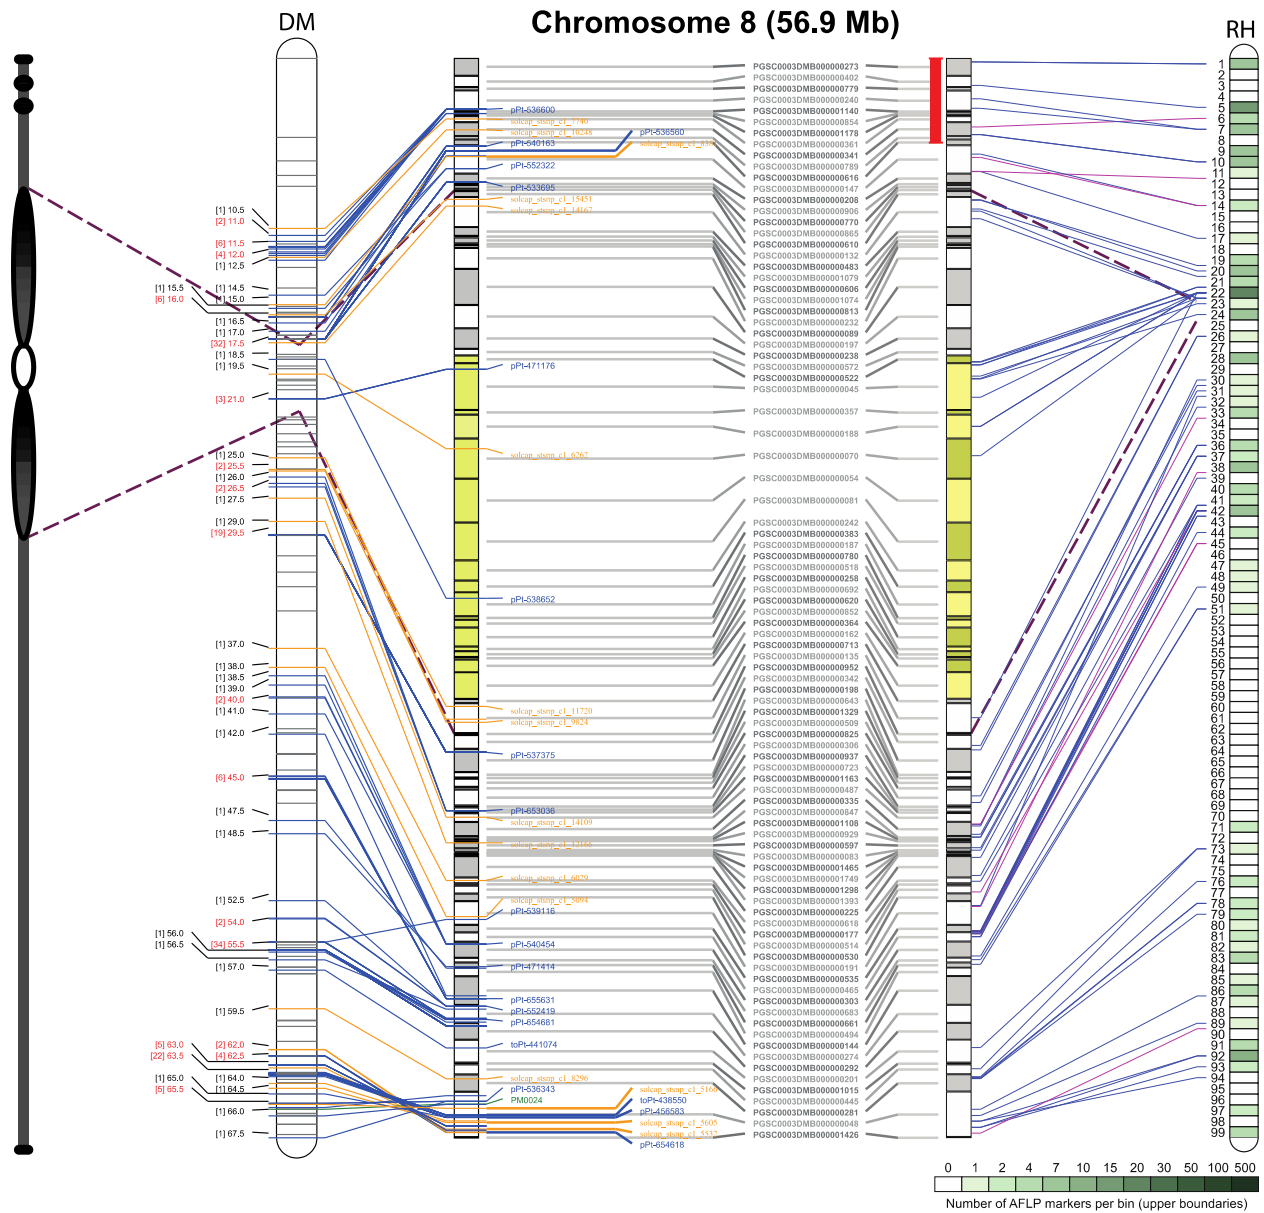

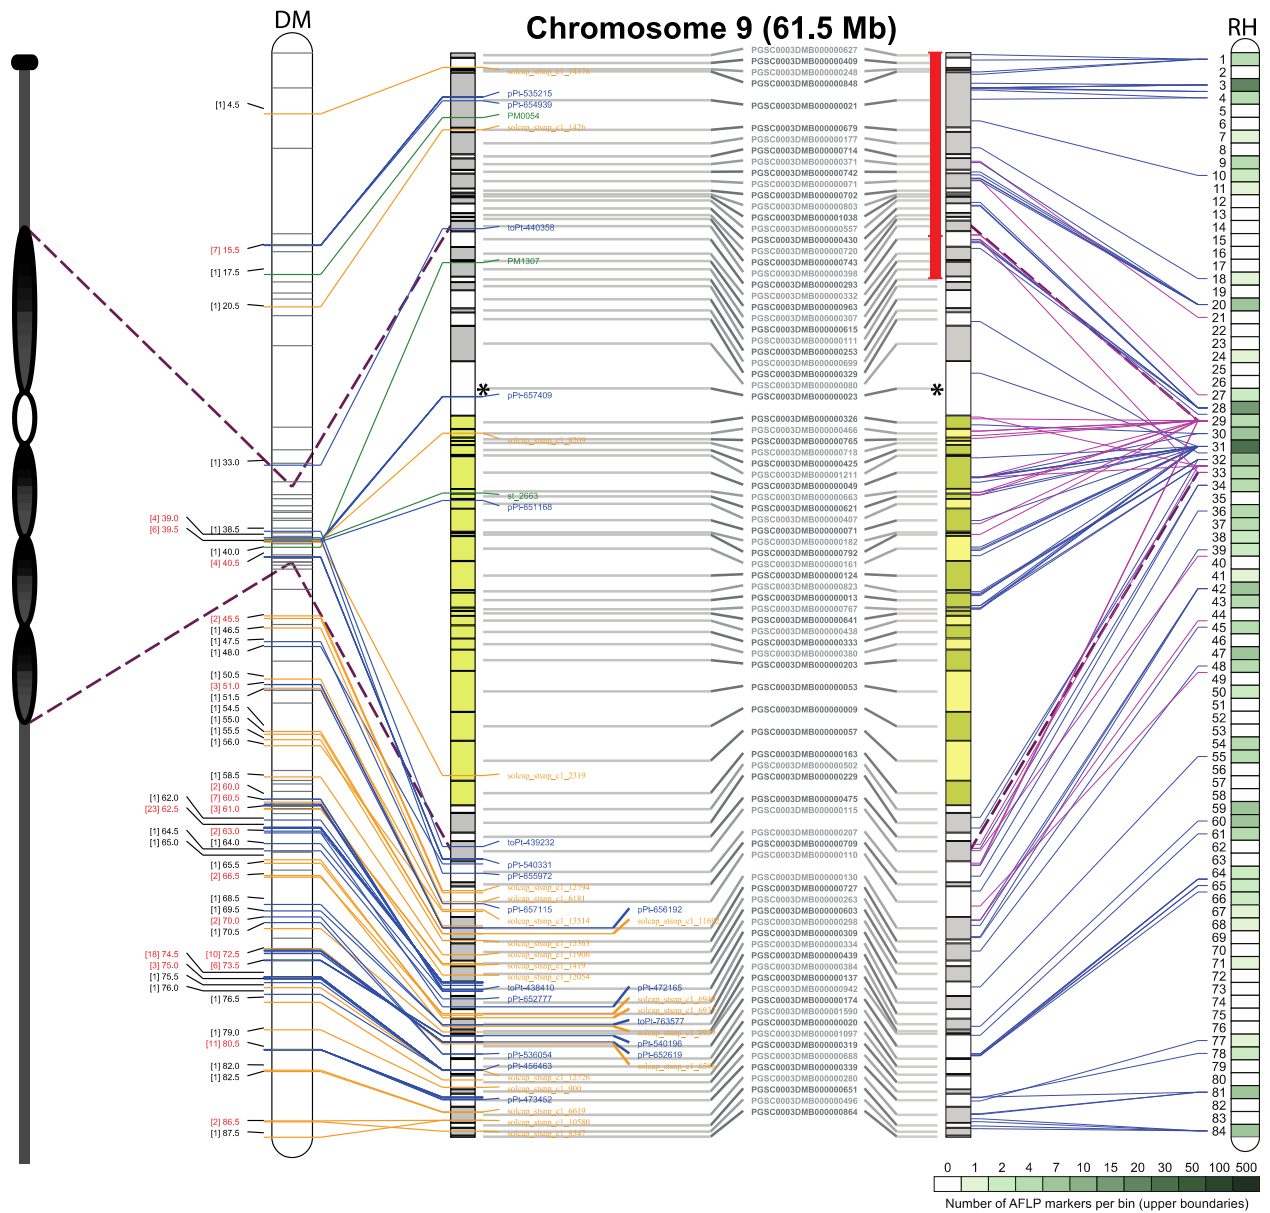

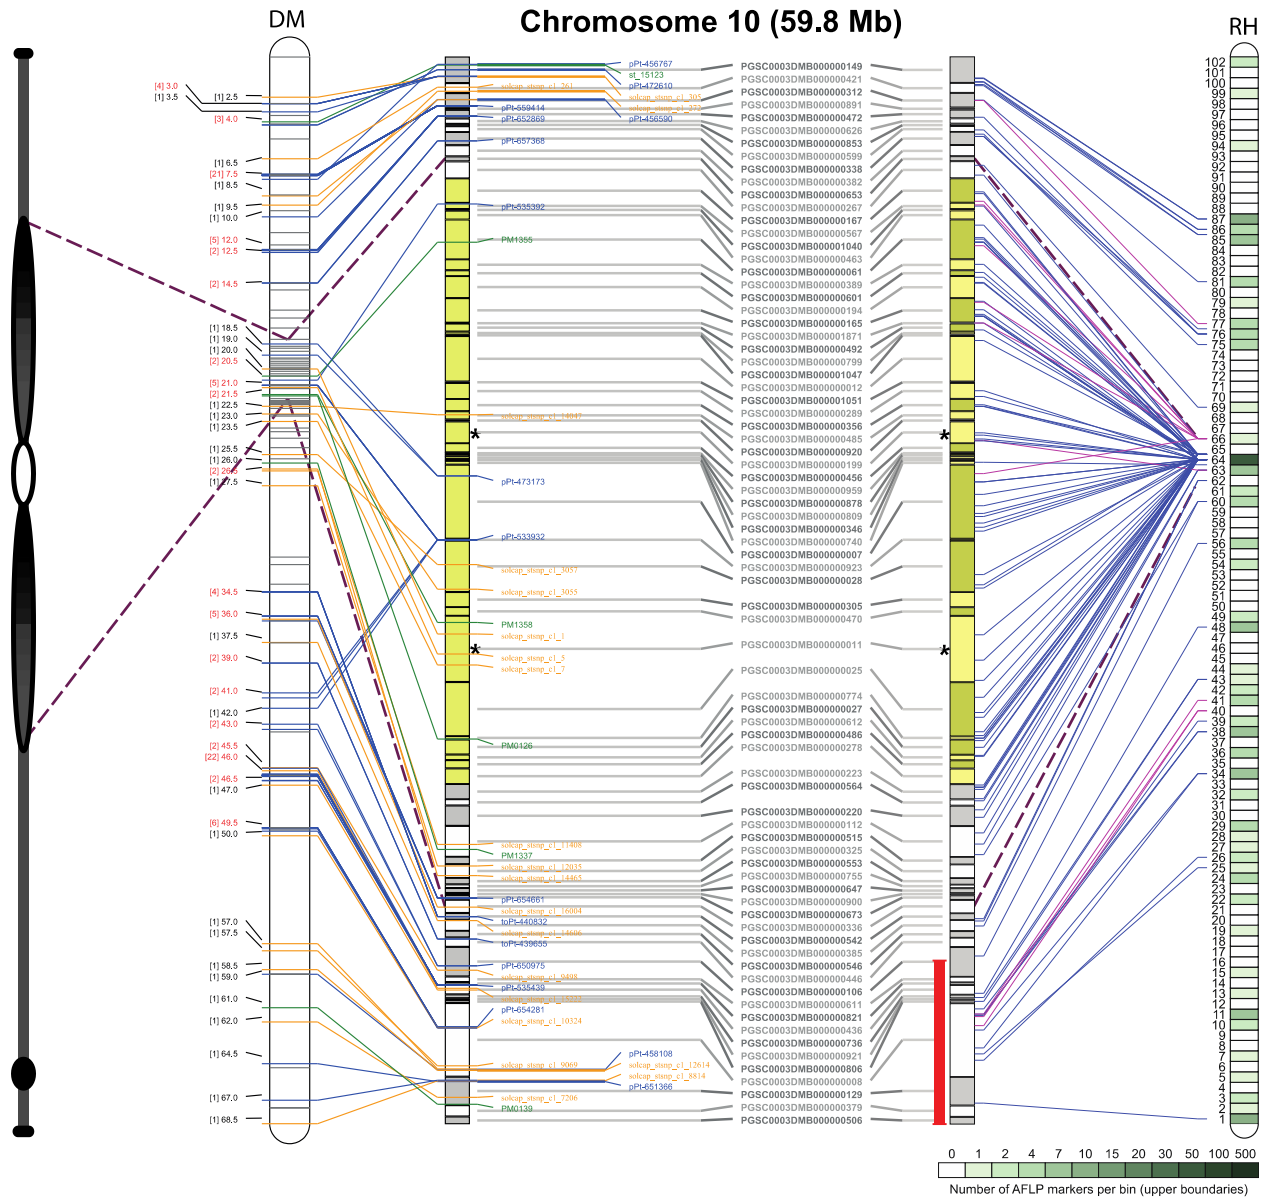

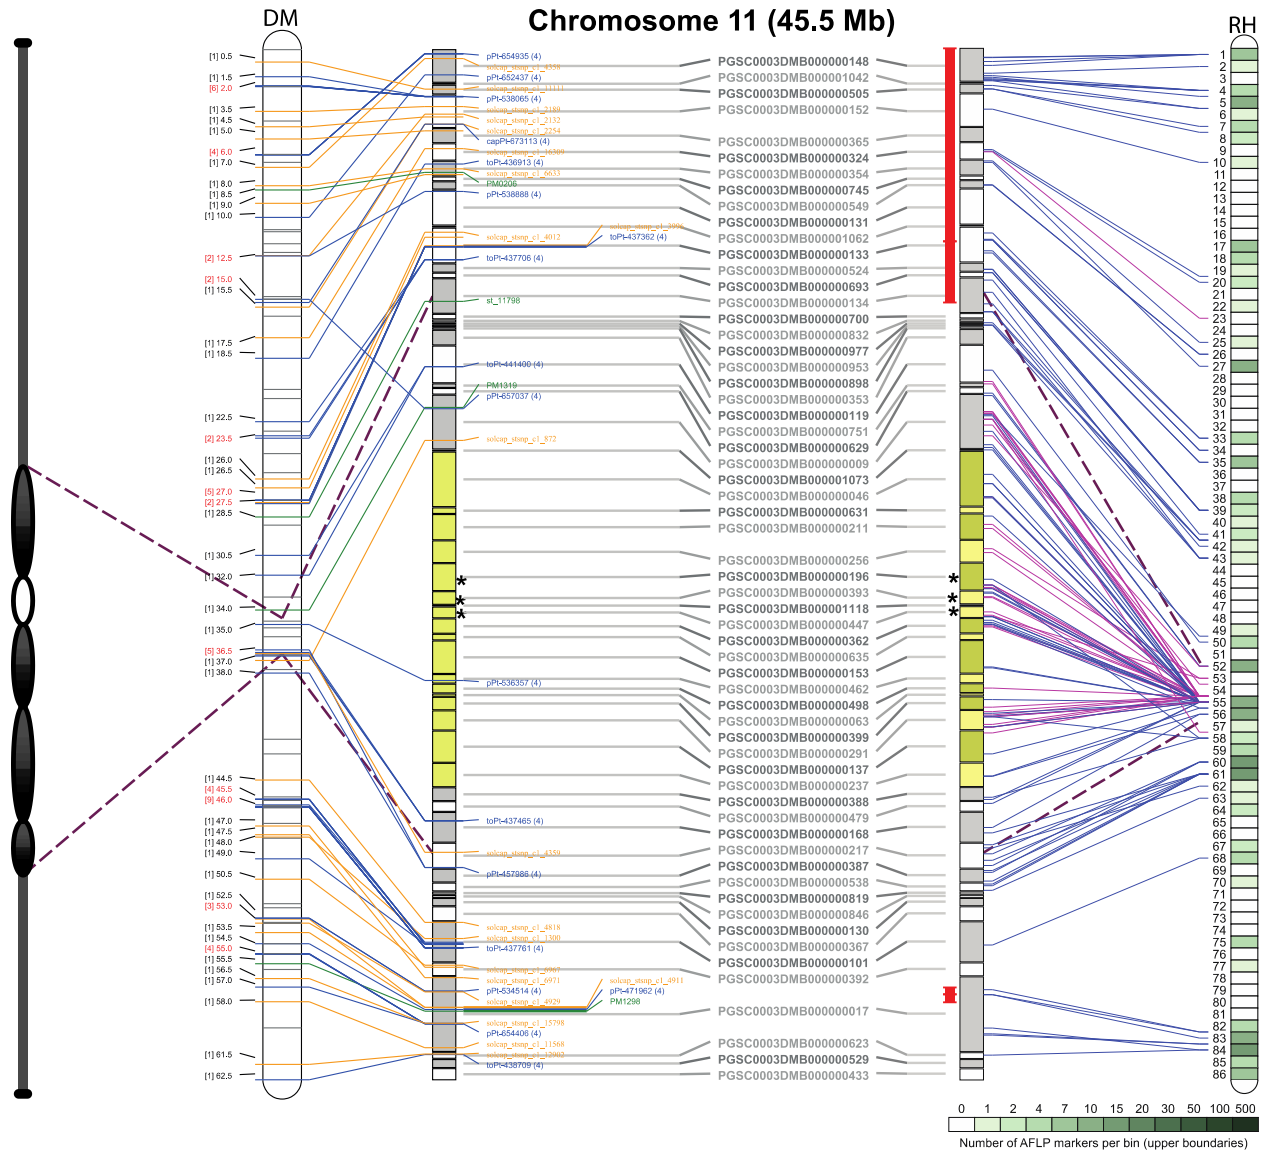

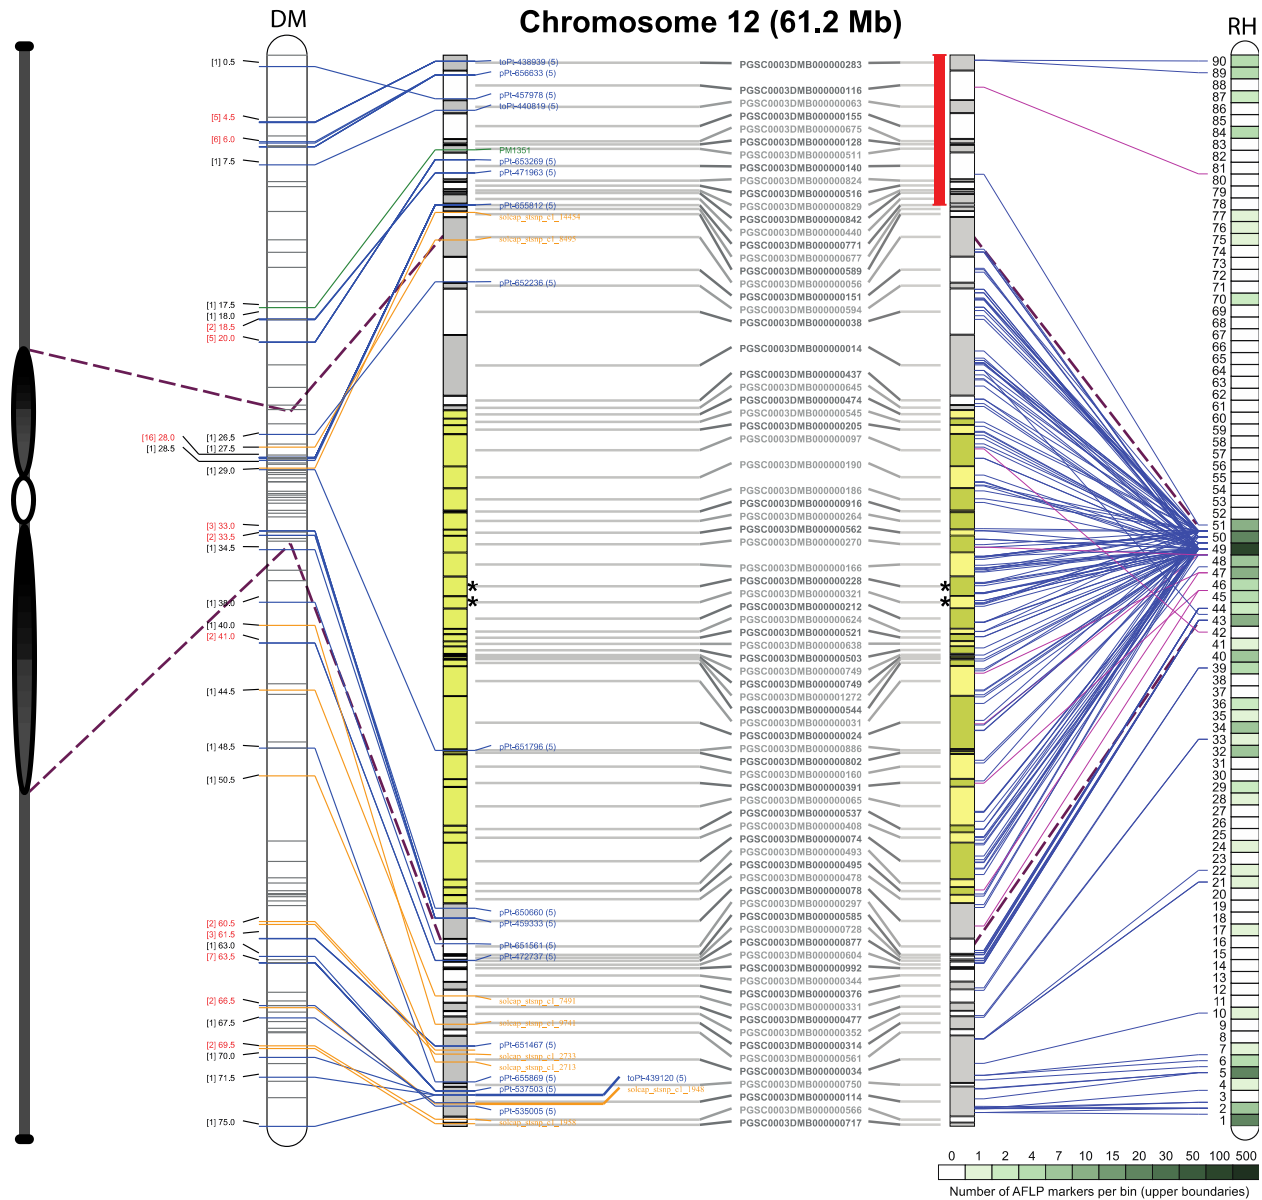

**Figure S2** Illustration of the chromosome 2 - 12 pseudomolecules (PMs) integrated with the DM and RH genetic maps. STS and AFLP markers anchor sequence locations in the chromosome PMs to the DMDD and RH genetic maps, respectively. The AFLP marker positions in the PM were identified through sequence tag alignment of BAC clones from the RH WGP physical map. Superscaffolds comprising the PM are shown as alternating grey and white rectangular blocks. The layout of the PM for each of the genetic maps is shown separately but is identical with superscaffold IDs depicted in the middle. The pachytene idiogram is adapted from the potato reference genome publication (Potato Genome Sequencing Consortium 2011). The putative centromere region and pericentromeric/heterochromatic boundaries are demarcated by asterisks and dashed lines, respectively. Each DMDD marker type is colour coded: blue = DArTs, yellow = SNPs, green = SSRs. Blue and magenta lines emerging from the RH genetic map represent AFLP anchors and the intensity of green color corresponds to the AFLP marker density per bin as reported by Van Os *et al.* (2006). Magenta lines represent AFLP markers with a relatively inaccurate mapping position on the RH genetic map, covering an interval of 5 or more bins. Regions in the central heterochromatin where superscaffold order and orientation are not completely resolved are indicated in yellow. Inversions with the tomato sequence are indicated with red interval bars.

**Tables S1-S9**

Available for download at <http://www.g3journal.org/lookup/suppl/doi:10.1534/g3.113.007153/-/DC1>

**Table S1** Details of (A) Simple sequence repeat (SSR), (B) Single nucleotide polymorphism (SNP) and (C) Amplified fragment length polymorphism (AFLP) markers employed in DMDD genotyping.

**Table S2** Location of sequence-tagged site (STS) markers employed in DMDD genotyping on the DM version 3 superscaffolds and DM version 4.03 pseudomolecules. STS markers include DArTs, SSRs and SNPs.

**Table S3** Revised annotation details for the Infinium 8.3k Potato Array SNPs (Felcher *et al.* 2012) on DM version 4.03 pseudomolecules.

**Table S4** Genetic and physical locations of STS markers (DArTs, SSRs and SNPs) mapped in DMDD and anchored in DM version 4.03 pseudomolecules.

**Table S5** Paracentric inversions between potato and tomato chromosomes detected by dot plot alignments between the chromosome pseudomolecules V4.03 of potato line DM and V2.40 of tomato cv. 'Heinz 1706'.

**Table S6** Summary of six BAC pools sequence assembly data comprising 82 DM BAC clones used for validating link peak-based orientation strategy for chromosome 4.

**Table S7** BAC pool assembly and validation details for chromosome 4 pseudomolecule version 4.03.

**Table S8** Centromere localisation in DM V3 sequence assembly.

**Table S9** Accessioned Golden Path (AGP) for the reference DM chromosome-scale pseudomolecules version 4.03. File also includes revised annotation details for potato genes and repeat regions (Potato Genome Sequencing Consortium 2011) and a list of chimeric superscaffolds.
