# Supplementary material for: Construction of Reference Chromosome-Scale Pseudomolecules for Potato: Integrating the Potato Genome with Genetic and Physical Maps
Source: PubMed Central journal article supplement (PMC3815063; doi:10.1534/g3.113.007153), 2013-11-01
Supplement: supp_g3.113.007153_FigureS1.pdf [file supp_g3.113.007153_FigureS1.pdf]

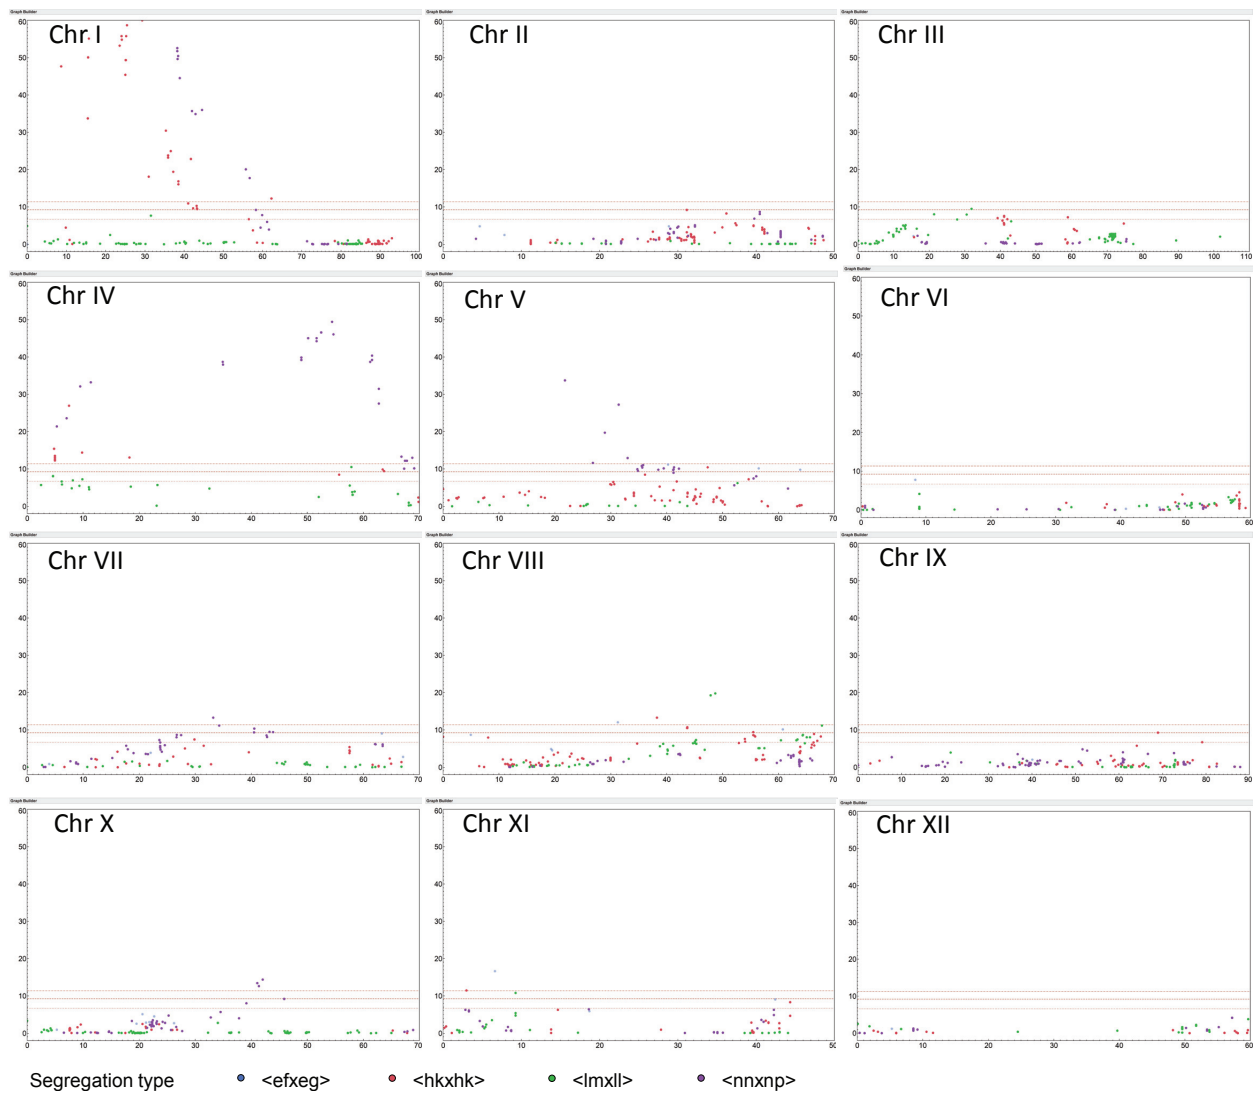

**Figure S1** Genome-wide patterns of marker segregation distortion in DMDD population for 1830 STS markers from different segregation categories plotted as a function of Chi-square value (y-axis) against marker physical position (x-axis) on each of the 12 potato chromosomes. Dotted, dashed and dotted-dashed lines represent Chi-square significance values at  $p = 0.01$  for marker segregation categories with two, three and four genotypic classes, respectively.
